# Supplementary material for: Optical and microphysical properties of natural mineral dust and anthropogenic soil dust near dust source regions over northwestern China
Source: Copernicus journal article supplement (doi:10.5194/acp-18-2119-2018), 2018-02-14
Supplement: Supplementary file 1 [file acp-18-2119-2018-supplement.pdf]

Supplement of Atmos. Chem. Phys., 18, 2119–2138, 2018  
<https://doi.org/10.5194/acp-18-2119-2018-supplement>  
© Author(s) 2018. This work is distributed under  
the Creative Commons Attribution 4.0 License.

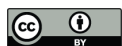

*Supplement of*

## **Optical and microphysical properties of natural mineral dust and anthropogenic soil dust near dust source regions over northwestern China**

**Xin Wang et al.**

*Correspondence to:* Xin Wang (wxin@lzu.edu.cn)

The copyright of individual parts of the supplement might differ from the CC BY 4.0 License.

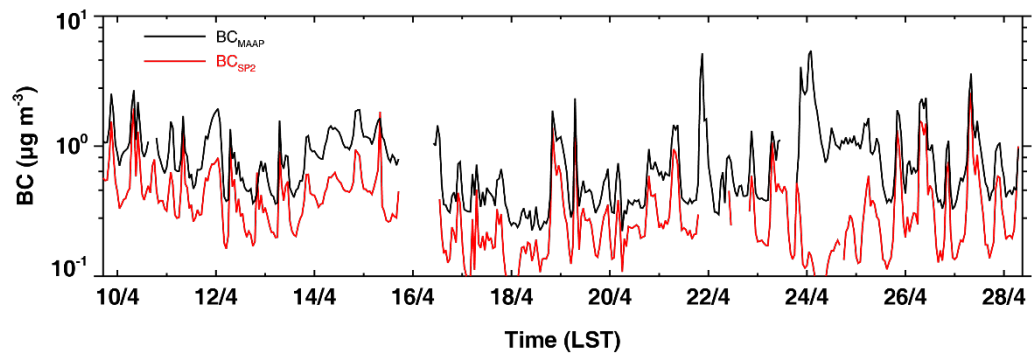

**Figure S1.** Temporal variations of BC mass concentration under the diameter of  $1 \mu\text{m}$  and  $2.5 \mu\text{m}$  measured by SP2 and MAAP in Zhangye from 9 to 28 April, respectively.

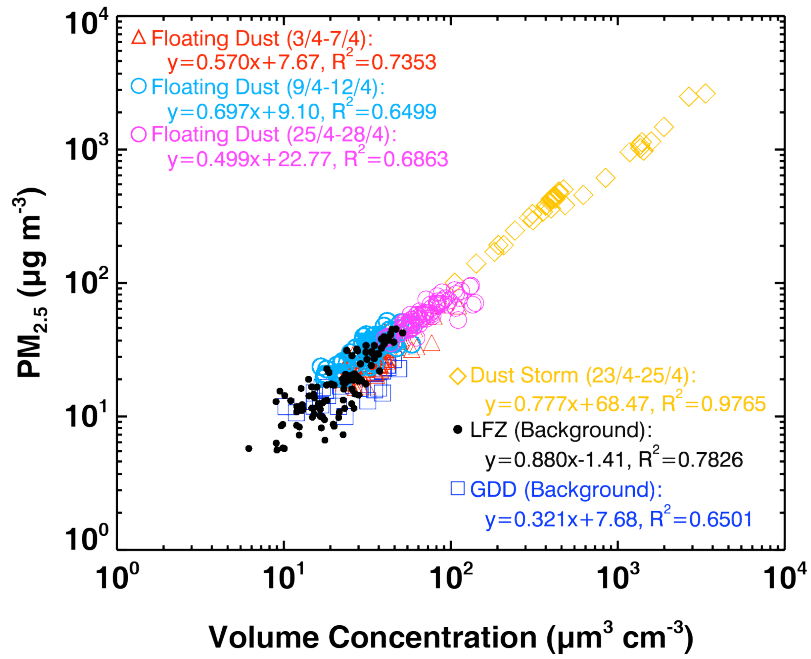

**Figure S2.** Scatter plot of mass concentration of  $PM_{2.5}$  versus the integrated volume concentration under the diameter of  $2.5 \mu m$  during the dust field campaign. The color symbols represent different atmospheric conditions during the dust field campaign.

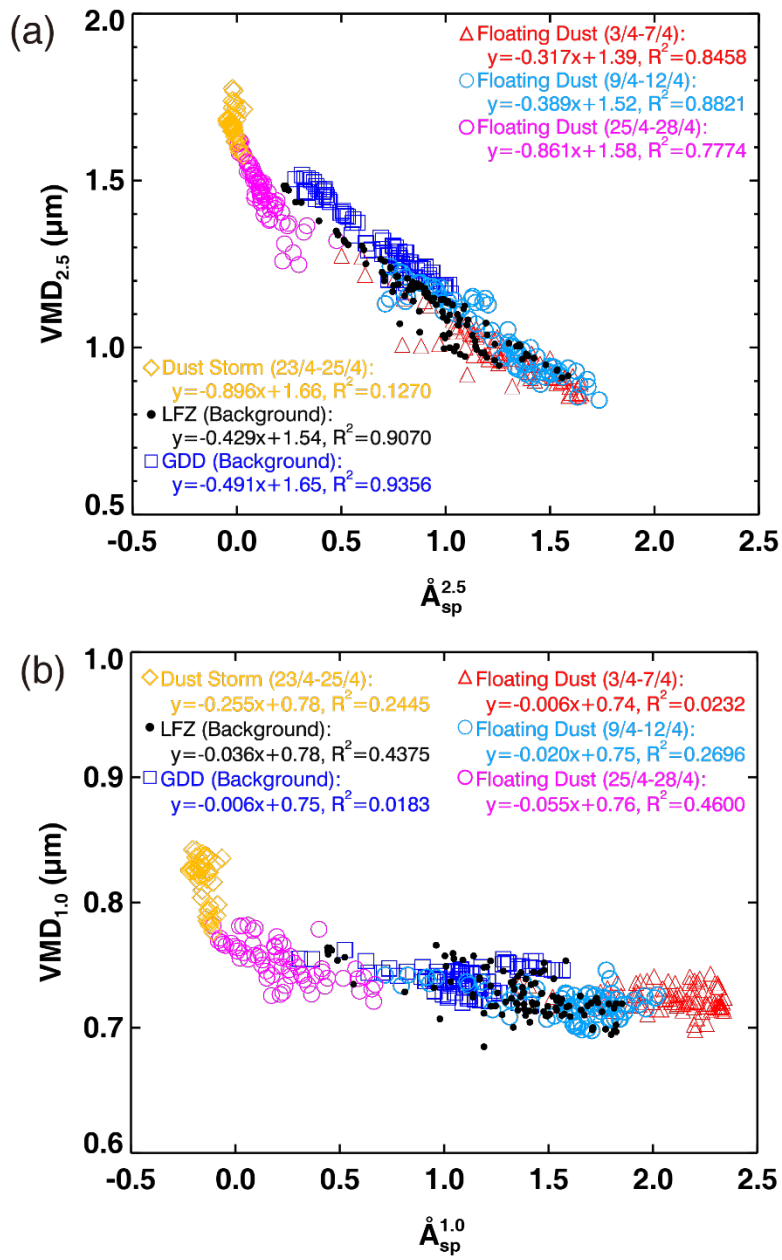

**Figure S3.** Scatter plot of the volume-weighted mean diameter (VMD) versus scattering Ångström exponent at 450–700 nm for **(a)** PM<sub>2.5</sub> and **(b)** PM<sub>1.0</sub>. The color symbols represent different atmospheric conditions during the dust field campaign.
